# Supplementary material for: Effects of Thinning Intensity on Litterfall Production, Soil Chemical Properties, and Fine Root Distribution in Pinus koraiensis Plantation in Republic of Korea
Source: MDPI journal article supplement (doi:10.3390/plants12203614), 2023-10-19
Supplement: s1 [file s1]

### Supplementary Material

Table S1. Summary of one-way and two-way ANOVA results for the effects of thinning treatments on litterfall.

| Treatment   | DF | P values |
|-------------|----|----------|
| Needles     | 2  | 0.149    |
| Broadleaves | 2  | 0.028    |
| Branches    | 2  | 0.186    |
| Others      | 2  | 0.097    |
| Total       | 2  | 0.353    |

Table S2. Summary of the two-way and three-way ANOVA results for the effects of thinning treatments, soil depth, and their interactions on fine root biomass and necromass.

| Treatment                    | DF | P      | Treatment                    | DF | P values |
|------------------------------|----|--------|------------------------------|----|----------|
| Fine root biomass            |    |        | Fine root necromass          |    |          |
| Pine species                 |    |        |                              |    |          |
| Three-way ANOVA              |    |        |                              |    |          |
| Diameter                     | 2  | <0.001 | Diameter                     | 2  | <0.001   |
| Treatment x Diameter         | 4  | 0.634  | Treatment x Diameter         | 4  | <0.001   |
| Depth x Diameter             | 4  | 0.036  | Depth x Diameter             | 4  | 0.003    |
| Treatment x Depth x Diameter | 8  | 0.975  | Treatment x Depth x Diameter | 8  | 0.765    |
| Two-way ANOVA                |    |        |                              |    |          |
| Treatment                    | 2  | <0.001 | Treatment                    | 2  | <0.001   |
| Depth                        | 2  | <0.001 | Depth                        | 2  | 0.002    |
| Treatment x Depth            | 4  | 0.781  | Treatment x Depth            | 4  | 0.831    |
|                              |    |        |                              |    |          |
| Other species                |    |        |                              |    |          |
| Three-way ANOVA              |    |        |                              |    |          |
| Diameter                     | 2  | <0.001 | Diameter                     | 2  | 0.065    |
| Treatment x Diameter         | 4  | <0.001 | Treatment x Diameter         | 4  | 0.028    |
| Depth x Diameter             | 4  | 0.003  | Depth x Diameter             | 4  | 0.693    |
| Treatment x Depth x Diameter | 8  | <0.001 | Treatment x Depth x Diameter | 8  | 0.811    |
| Two-way ANOVA                |    |        |                              |    |          |
| Treatment                    | 2  | <0.001 | Treatment                    | 2  | 0.012    |
| Depth                        | 2  | <0.001 | Depth                        | 2  | 0.270    |
| Treatment x Depth            | 4  | <0.001 | Treatment x Depth            | 4  | 0.264    |
|                              |    |        |                              |    |          |
| Total                        |    |        |                              |    |          |
| Three-way ANOVA              |    |        |                              |    |          |
| Diameter                     | 2  | <0.001 | Diameter                     | 2  | <0.001   |
| Treatment x Diameter         | 4  | 0.237  | Treatment x Diameter         | 4  | <0.001   |
| Depth x Diameter             | 4  | 0.081  | Depth x Diameter             | 4  | 0.002    |
| Treatment x Depth x Diameter | 8  | 0.779  | Treatment x Depth x Diameter | 8  | 0.787    |
| Two-way ANOVA                |    |        |                              |    |          |
| Treatment                    | 2  | 0.001  | Treatment                    | 2  | <0.001   |
| Depth                        | 2  | <0.001 | Depth                        | 2  | 0.001    |
| Treatment x Depth            | 4  | 0.730  | Treatment x Depth            | 4  | 0.855    |
